# Supplementary material for: High-sensitivity calcium biosensor on the mitochondrial surface reveals that IP3R channels participate in the reticular Ca2+ leak towards mitochondria
Source: PubMed Central journal article supplement (PMC10256219; doi:10.1371/journal.pone.0285670), 2023-06-09

Figure S1A

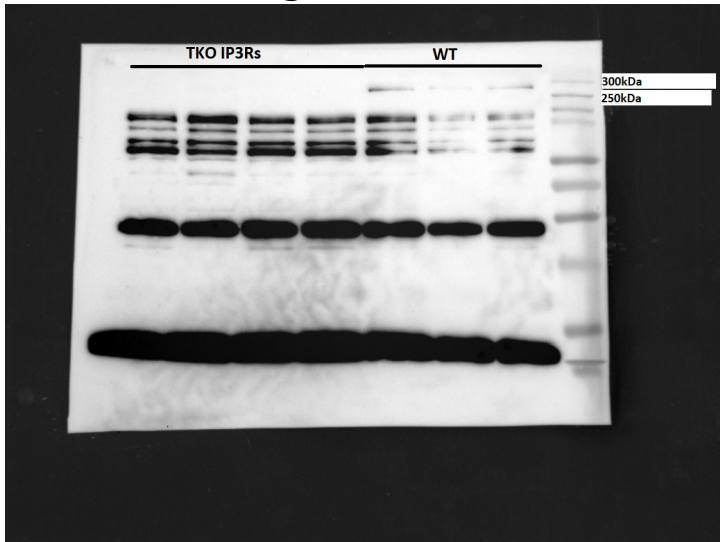

Figure S1A

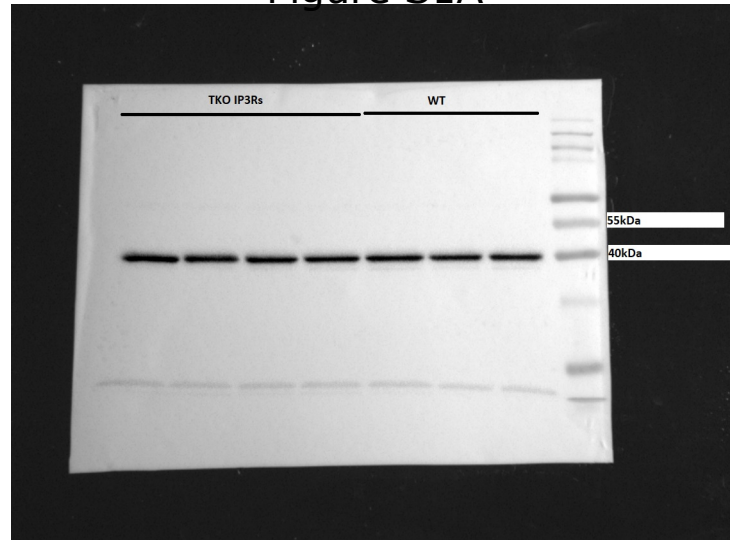

Figure S1B

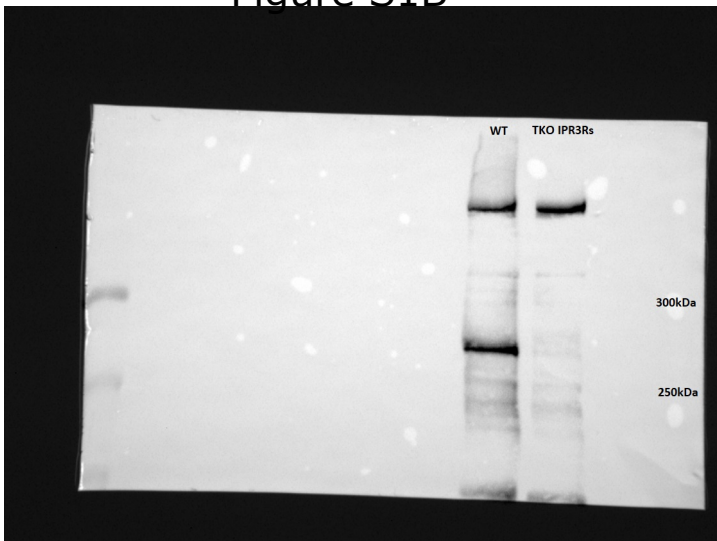

Figure S1C

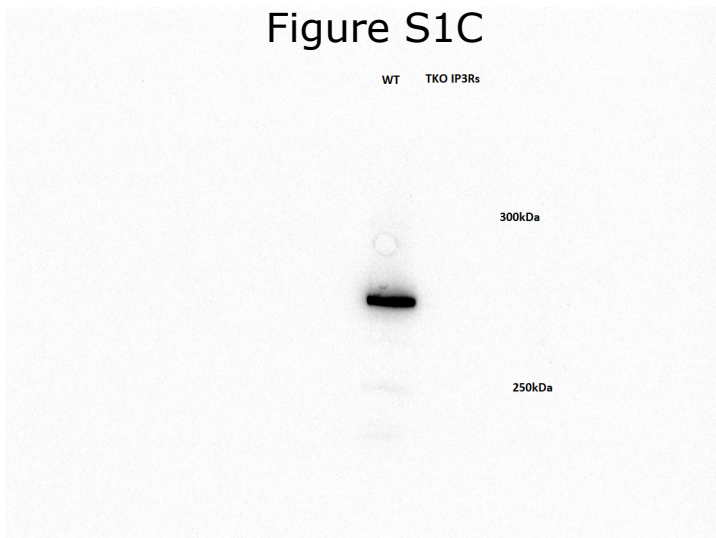

Supplement: pone.0285670.s002.pdf [file pone.0285670.s002.pdf]
